# Supplementary material for: EFA6B regulates a stop signal for collective invasion in breast cancer
Source: PubMed Central journal article supplement (PMC8044243; doi:10.1038/s41467-021-22522-4), 2021-04-13
Supplement: 41467_2021_22522_MOESM1_ESM.pdf [file 41467_2021_22522_MOESM1_ESM.pdf]

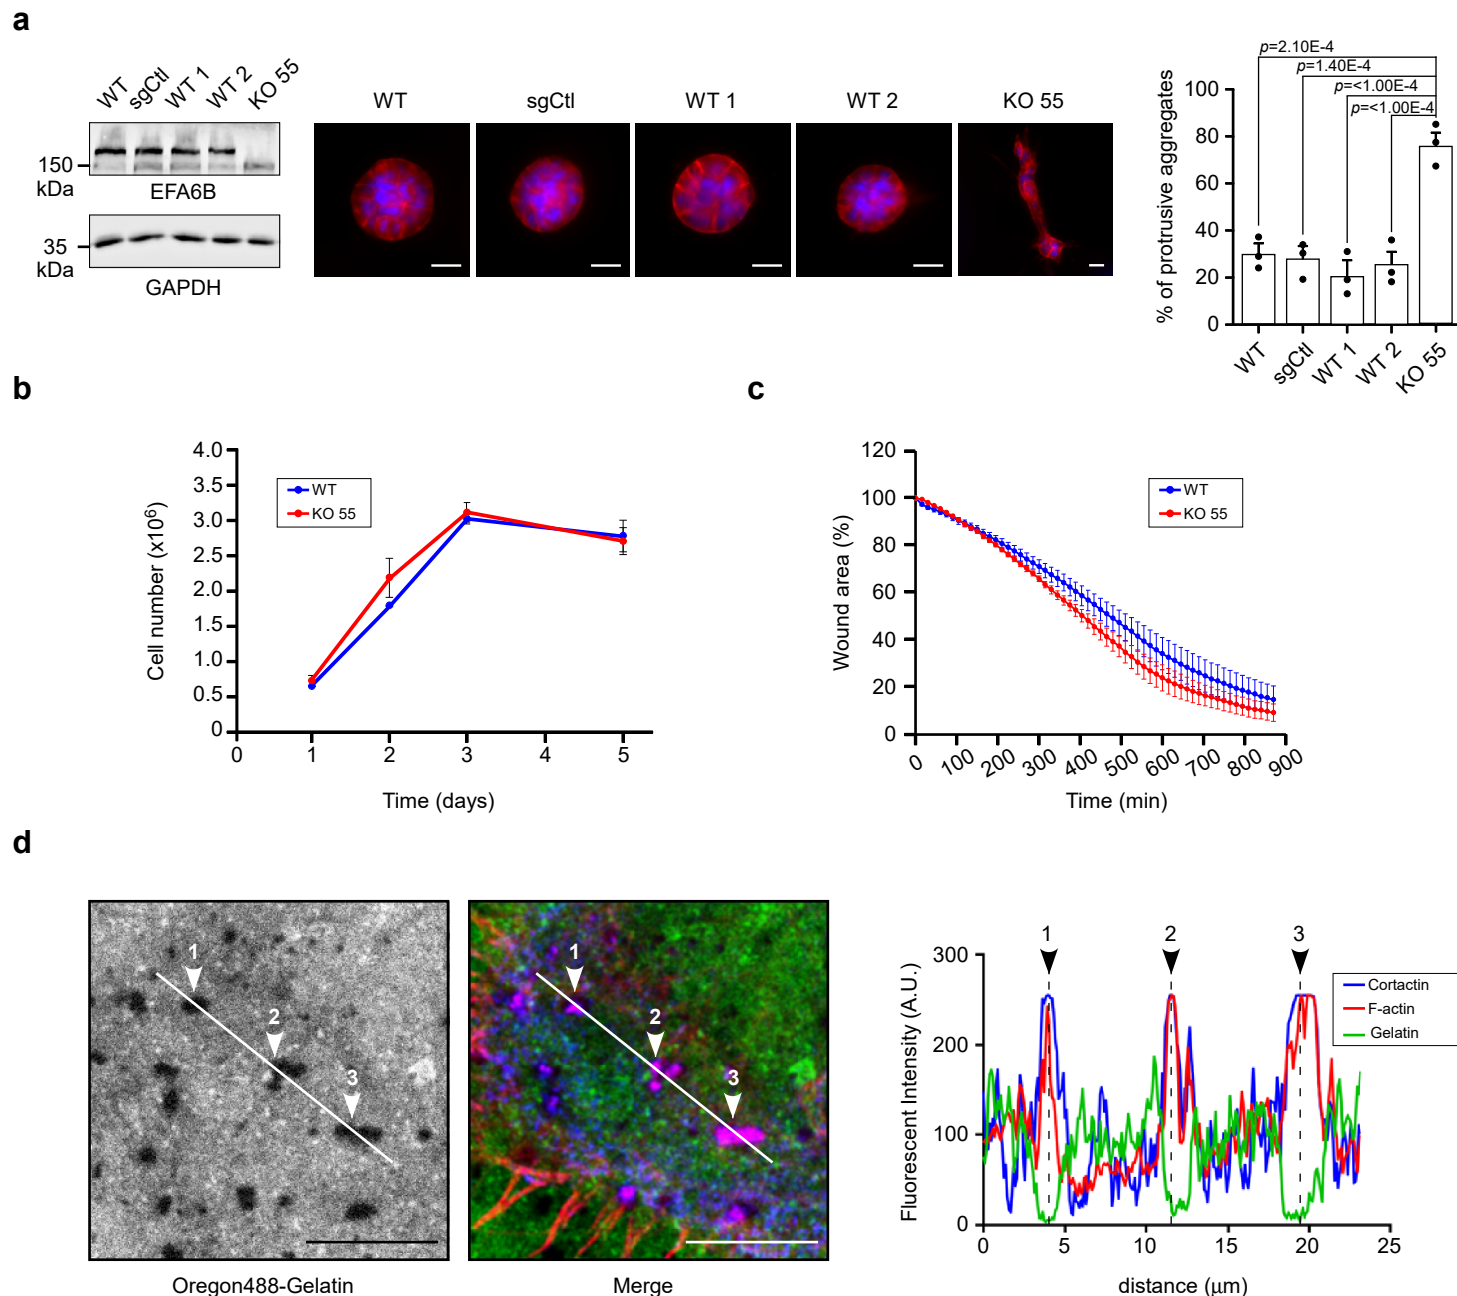

**Supplementary Figure 1: EFA6B knock-out does not affect cell proliferation nor migration but stimulates the formation of degradative invadopodia.** **a** Left panel: Expression of EFA6B in MCF10A WT, MCF10A WT expressing the sgRNA control (sgCtl), two negative clones (WT1, WT2) and MCF10A KO55 cells analyzed by immunoblot. GAPDH served as a loading control. Middle panel: Representative images of the indicated cell lines placed in collagen for 4 days. The cell aggregates were processed for immunofluorescence to label the endogenous F-actin (red) and the nuclei (blue). Scale bars 20μm. Right panel: Quantification of the percentage of cell aggregates with invasive protrusions of the indicated MCF10A cell lines grown in collagen for 2 days. N=3, average ±SEM, one-way ANOVA test with Dunnett's multiple comparison p values. **b** MCF10A WT and EFA6B KO55 cells were plated at 5x10<sup>5</sup> cells per well in a 12-well dish and counted over 5 days using the LUNA™ cell counter (Logos Biosystems). The graph represents the mean of 2 independent experiments ±SD. **c** MCF10A WT and EFA6B KO55 cells were plated at confluency in a 12-well dish (106 cells per well). The next day a wound was performed using a pipet tip. After a wash with complete medium, the closure of the wound was followed overtime by phase contrast videomicroscopy using a Cytation5 (Biotek). The images taken every 15min were processed and the area of the wound closure calculated using the software ImageJ. The graph represents the percentage of closure relative to the surface area of the wound at t=0 of 5 independent experiments performed in triplicates ±SEM. **d** EFA6B KO55 cells were stained for F-actin (red) and cortactin (blue) 48h after plating on Oregon488-gelatin (green) coated coverslips. The left image is the Oregon488-gelatin staining to visualize the digested spots. The right image is the merge of all three markers to visualize the co-localization of cortactin with F-actin, appearing in purple, coincidental with the spots of digested gelatin. Scale bars 10μm. The graph shows the fluorescent intensity of all three markers over the indicated line scan on the image. Arrowheads point to three invadopodia selected along the line scan. Source data are provided as a Source Data file.

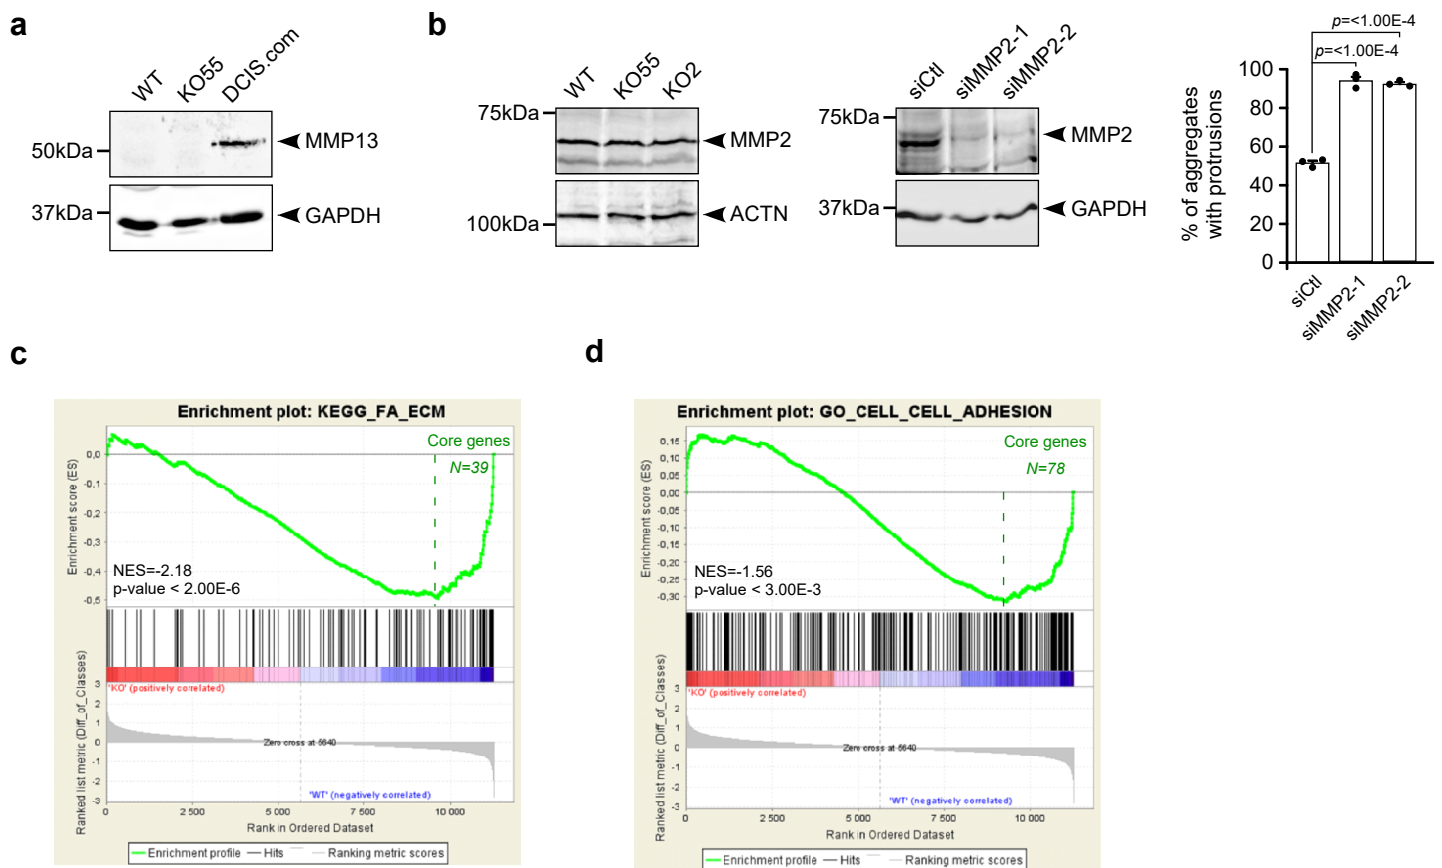

**Supplementary Figure 2:** **a** MMP13 is not expressed in MCF10A cells. Expression of MMP13 by immunoblot in MCF10A WT, EFA6B KO55 and the control positive cell line MCF10ADCIS.com. MMP13 antibody was from R&D systems (MAB511). GAPDH served as a loading control. **b** MMP2 depletion accelerates invasion. Left panel: Expression of MMP2 analyzed by immunoblot in MCF10A WT, EFA6B KO55 and KO2 cells. Actinin (ACTN) served as a loading control. Middle panel: Expression of MMP2 analyzed by immunoblot two days post-transfection of EFA6B KO55 cells with the indicated siRNAs (Dharmacon ON-TARGETplus, siRNA-1: ACAAGAACCAGAUCAUA, siRNA-2: GGAAUGCCAUCCCCGAUAA). MMP2 antibody was from Sigma (HPA001939). GAPDH served as a loading control. Right panel: quantification of the percentage of aggregates (n=100) with invasive protrusions grown in 3D-collagen (3mg/ml) for 36 hrs after transfection with the indicated siRNAs. N=3, average  $\pm$ SEM, one-way ANOVA test with Dunnett's multiple comparison p values.

Gene set enrichment analysis (GSEA) of *PSD4* KO versus WT MCF10A cells, showing enrichment in the WT cells of the "Matrisome+receptors" gene set (KEGG\_FA\_ECM, including genes of the KEGG gene sets Focal Adhesion ('FA'), ECM-receptor interaction ('ECM') and the human matrisome database) (**c**), and of the Gene Ontology "cell-cell adhesion" signature (**d**). GSEA p-values were based on permutation-generated null distribution of enrichment scores (ES) within the Broad Institute software, naturally two-sided test. Benjamini-Hodgberg method was used to correct for multiple comparisons. Source data are provided as a Source Data file.

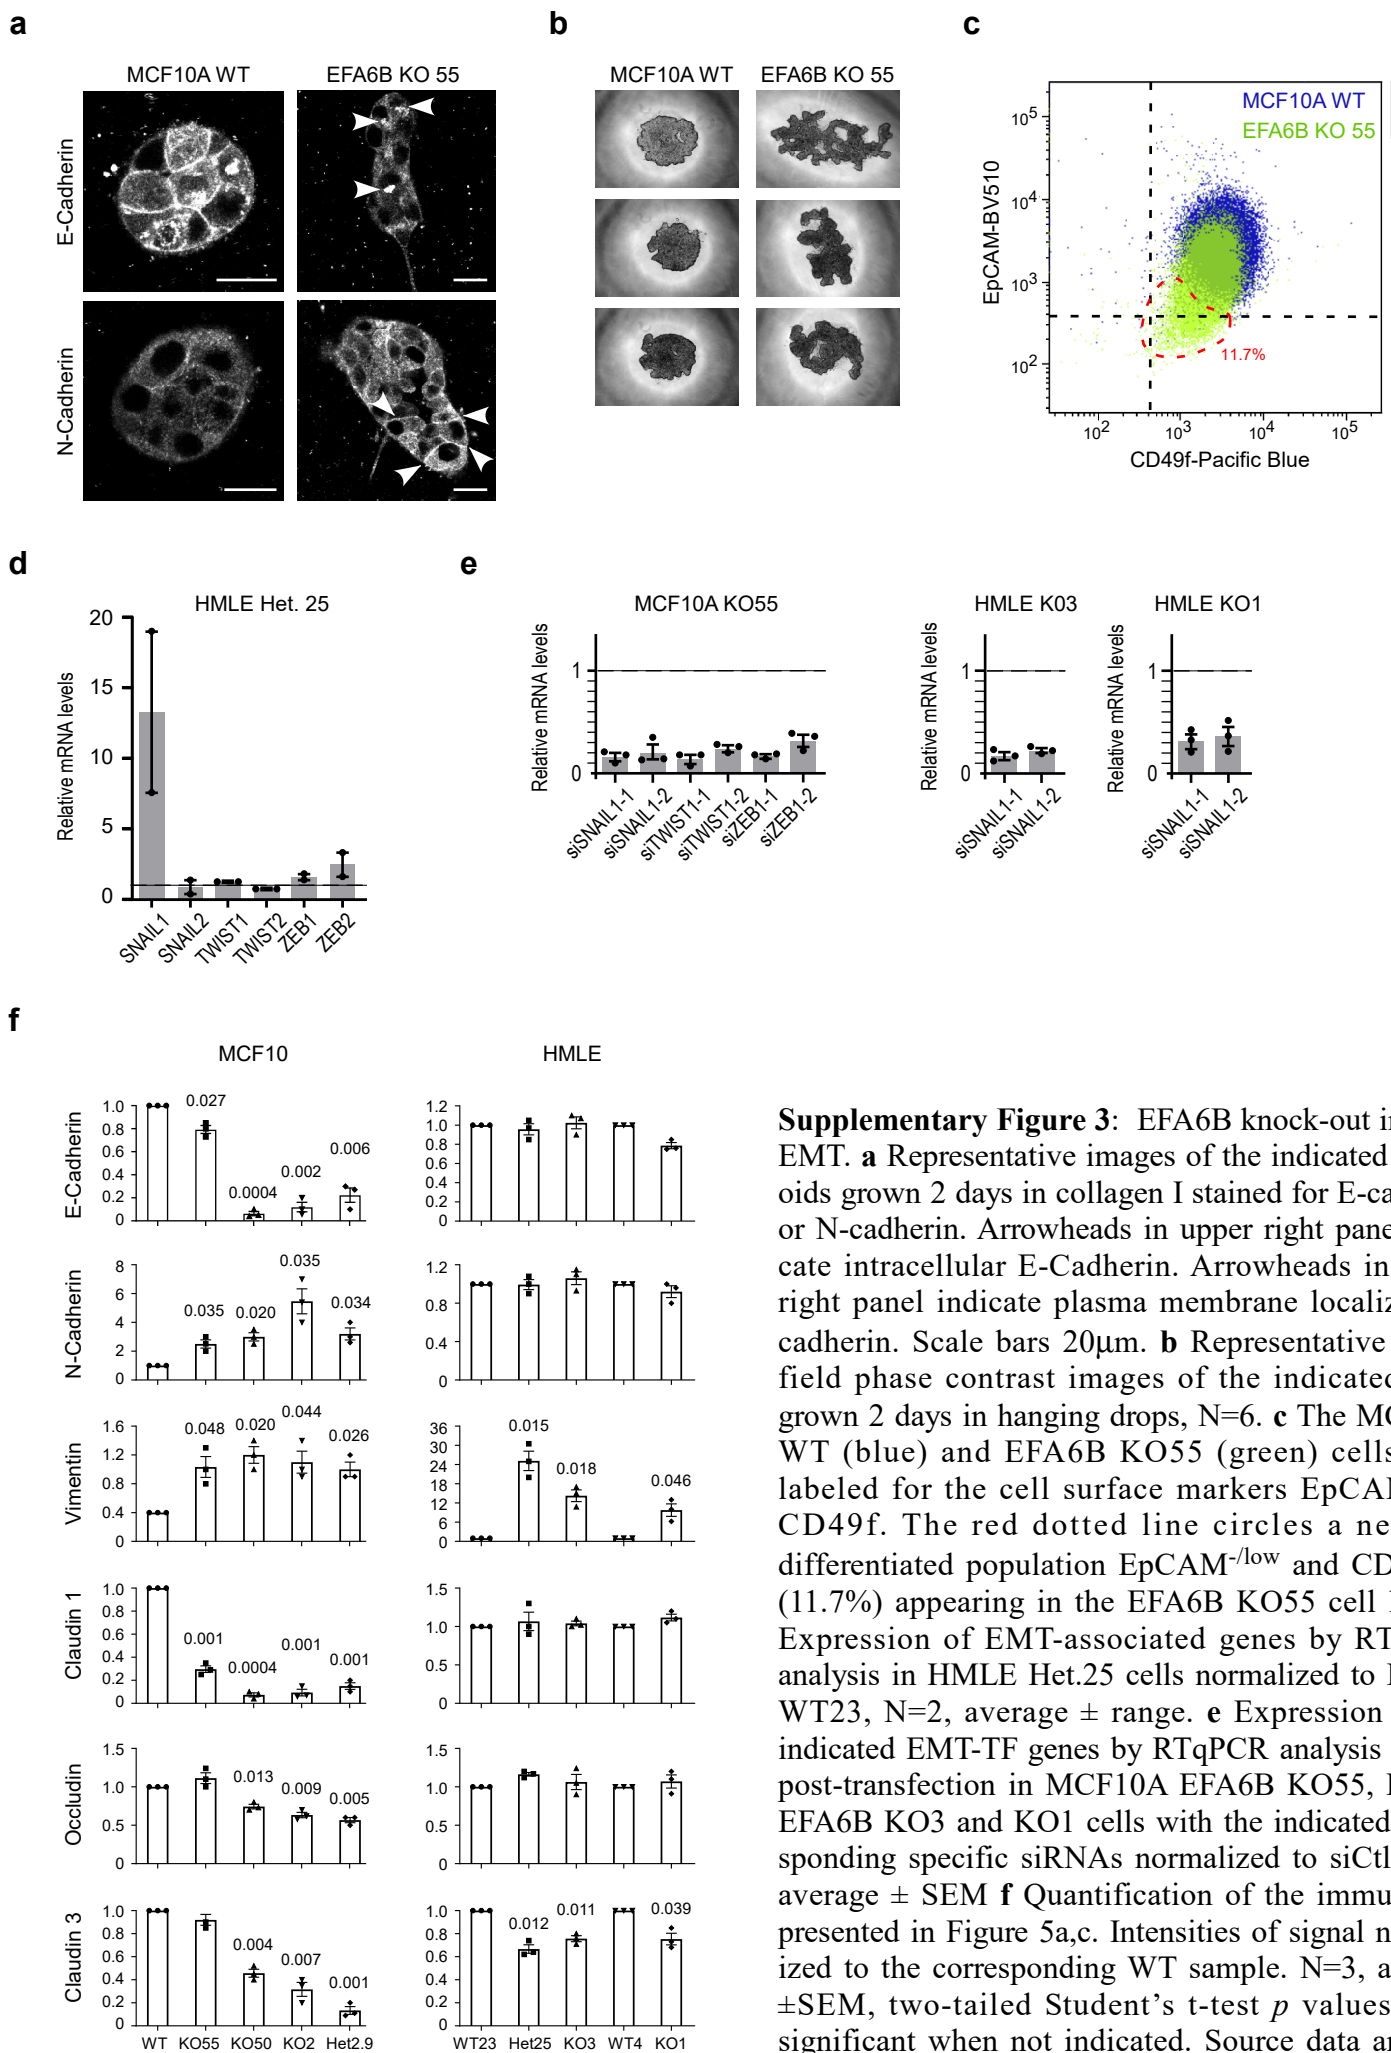

**Supplementary Figure 3: EFA6B knock-out induces EMT.** **a** Representative images of the indicated spheroids grown 2 days in collagen I stained for E-cadherin or N-cadherin. Arrowheads in upper right panel indicate intracellular E-Cadherin. Arrowheads in lower right panel indicate plasma membrane localized N-cadherin. Scale bars 20 $\mu$ m. **b** Representative bright field phase contrast images of the indicated cells grown 2 days in hanging drops, N=6. **c** The MCF10A WT (blue) and EFA6B KO55 (green) cells were labeled for the cell surface markers EpCAM and CD49f. The red dotted line circles a new dedifferentiated population EpCAM<sup>low</sup> and CD49f<sup>low</sup> (11.7%) appearing in the EFA6B KO55 cell line. **d** Expression of EMT-associated genes by RTqPCR analysis in HMLE Het.25 cells normalized to HMLE WT23, N=2, average  $\pm$  range. **e** Expression of the indicated EMT-TF genes by RTqPCR analysis 2 days post-transfection in MCF10A EFA6B KO55, HMLE EFA6B KO3 and KO1 cells with the indicated corresponding specific siRNAs normalized to siCtl. N=3, average  $\pm$  SEM. **f** Quantification of the immunoblot presented in Figure 5a,c. Intensities of signal normalized to the corresponding WT sample. N=3, average  $\pm$ SEM, two-tailed Student's t-test *p* values, non-significant when not indicated. Source data are provided as a Source Data file.

**a**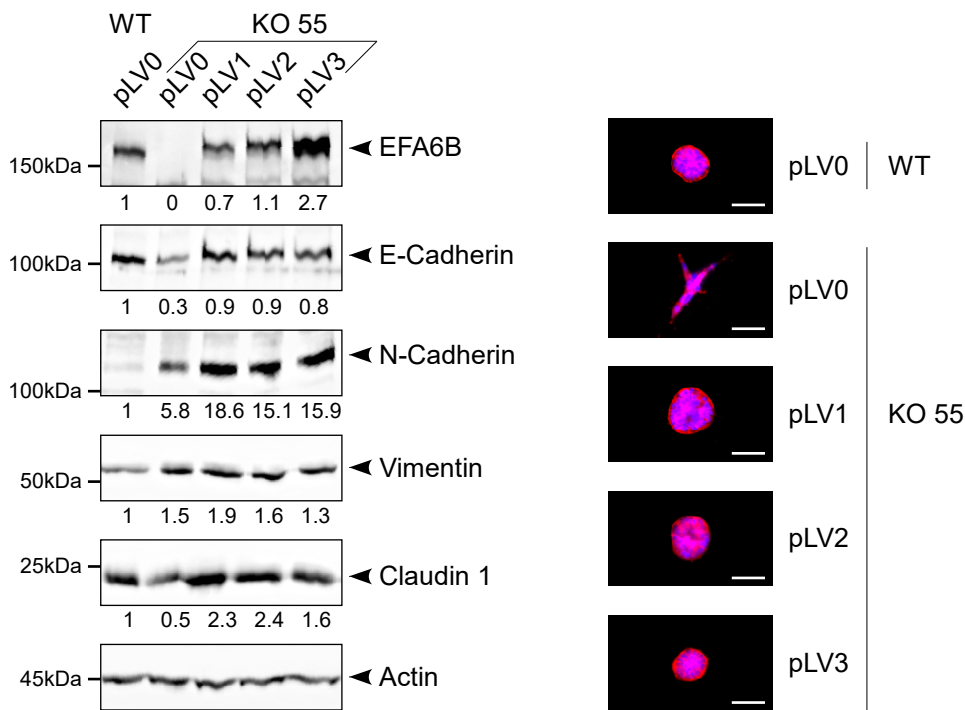**b**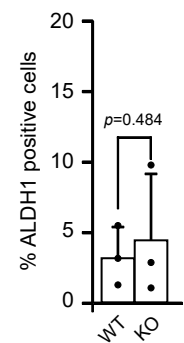**c**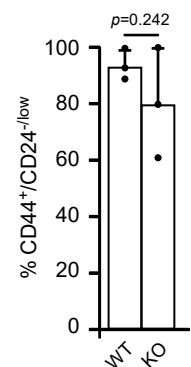**d**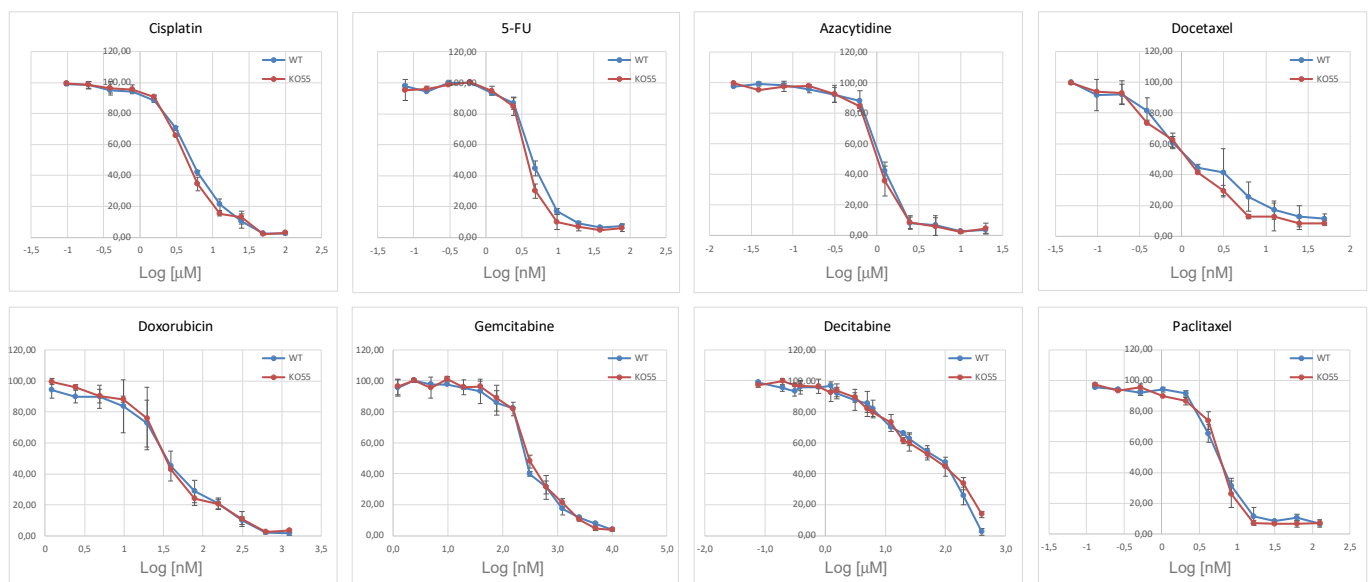

**Supplementary Figure 4: EFA6B knock-out induces a partially reversible EMT without the acquisition of stemness characteristics.** **a** Partial EMT reversal upon expression of exogenous EFA6B by lentiviral infection. The empty lentiviral plasmid pLV-Neo-CMV (pLV0) was used as a negative control, and expressed in MCF10A WT or EFA6B KO55 cells. pLV-EFA6B at MOI 1/50 (pLV1), 1/25 (pLV2) or 1/10 (pLV3) was used to express increasing amounts of EFA6B in KO55 cells. Left panel: expression of the indicated proteins analyzed by immunoblot. Actin served as a loading control. N=3. Right panel: representative images of the corresponding cell aggregates placed in collagen for 4 days. The cells were processed for immunofluorescence to label the endogenous F-actin (red) and the nuclei (blue). Scale bars 20 $\mu$ m. **b** Percentage of ALDH1 positive cells in MCF10A WT and EFA6B KO55 cell lines analyzed by FACS. N=3; average  $\pm$ SD, two-tailed Student's t-test  $p$  value. **c** Percentage of CD44<sup>+</sup>/CD24<sup>-low</sup> cells in MCF10A WT and EFA6B KO55 cell lines analyzed by FACS. N=3; average  $\pm$ SEM, two-tailed Student's t-test  $p$  value. **d** The cell viability of both MCF10A WT and EFA6B KO55 cells after three days of drug exposure at the indicated concentrations was determined by alamar blue-based assay (Invitrogen). Fluorescence intensity was measured at 530nm and 590nm wavelength for excitation and emission using a microplate reader (Infinite® M1000 Pro, TECAN). The graph curves represent the mean percentage of viability relative to the respective untreated controls of three independent experiments  $\pm$ SEM. Source data are provided as a Source Data file.



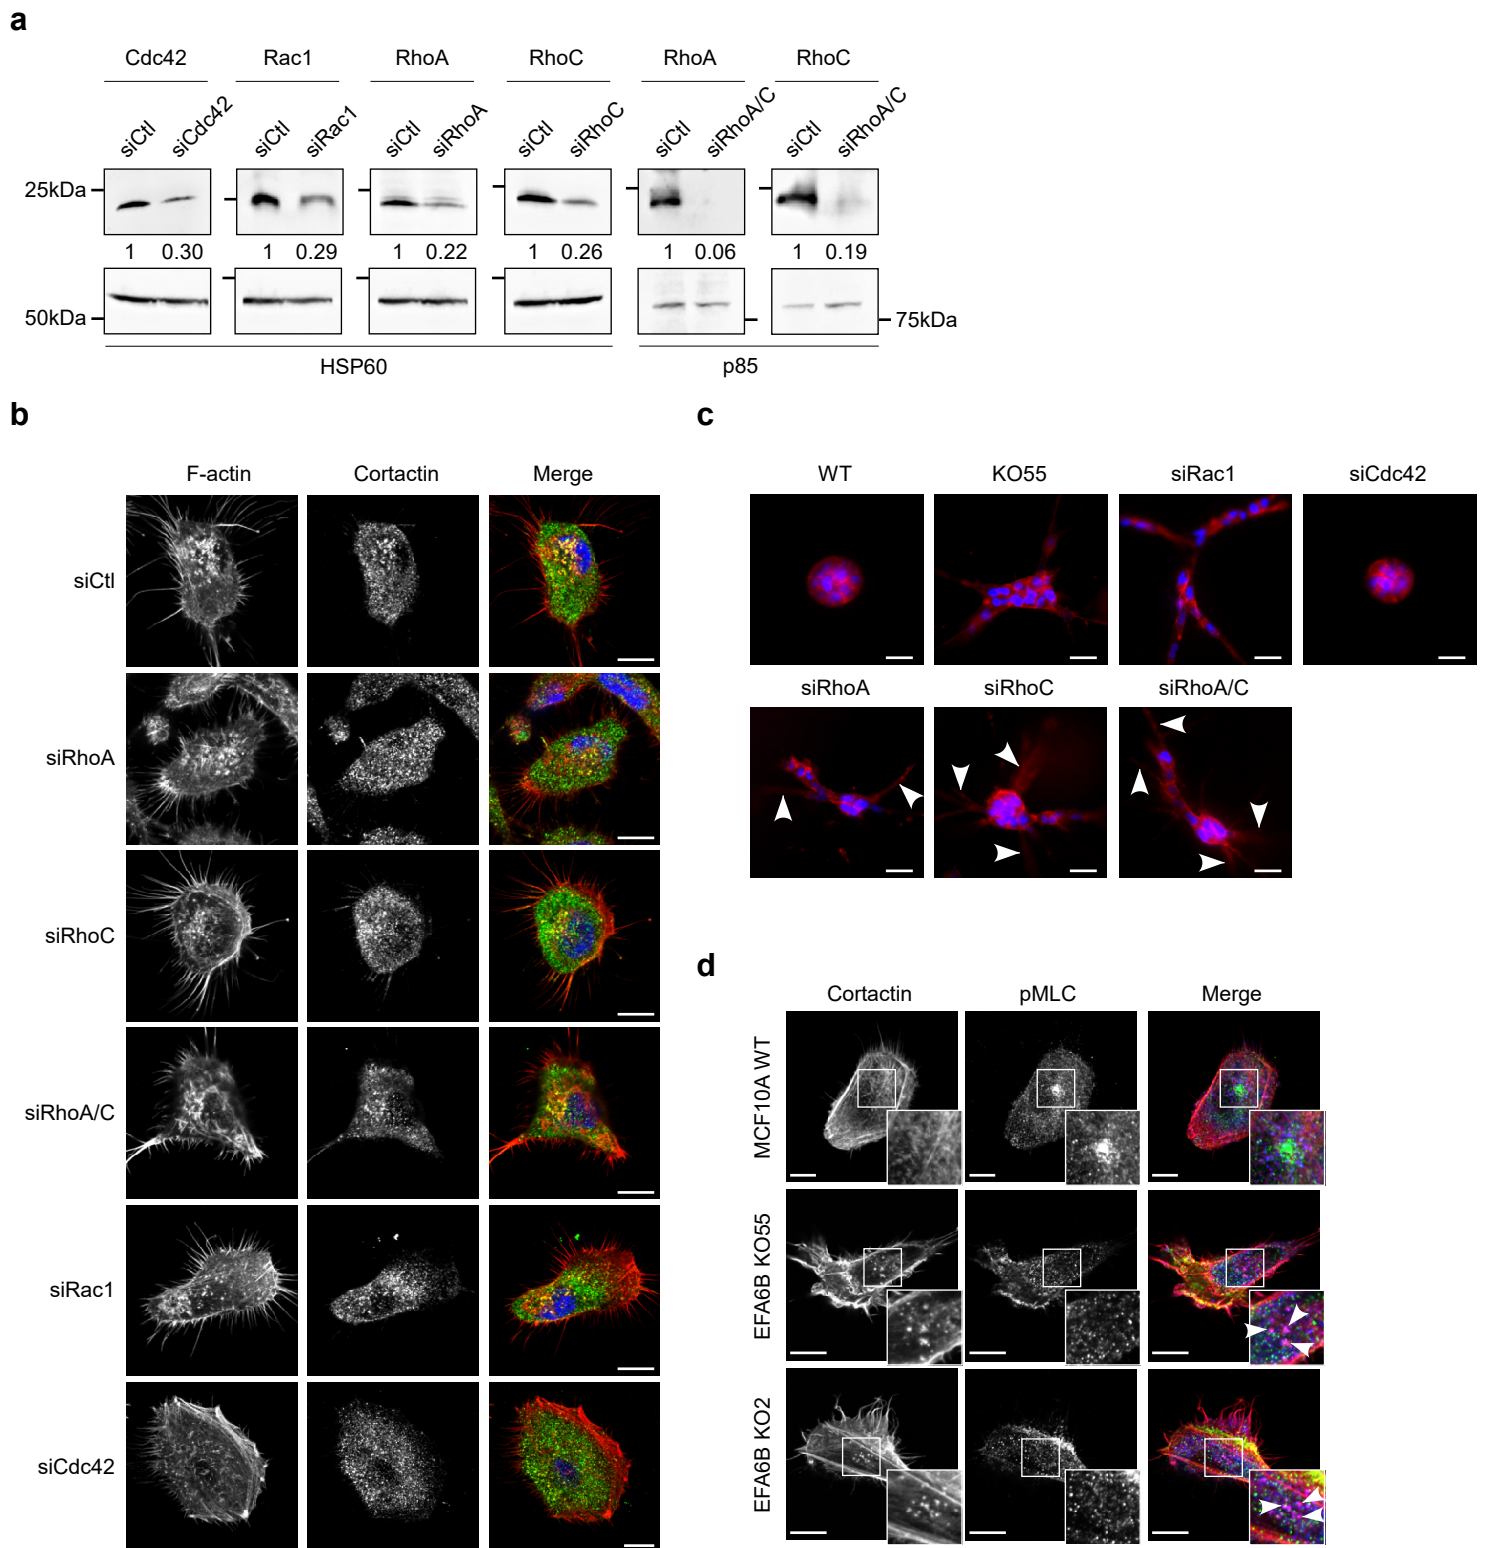

**Supplementary Figure 5:** Depletion of RHOA, RHOC, RAC1 or CDC42 all altered cell morphology but only depletion of CDC42 inhibited invasion in collagen. **a** Expression of the indicated proteins analyzed by immunoblot two days post-transfection of EFA6B KO55 cells with the indicated siRNAs. HSP60 or p85 served as a loading control. **b** Representative images of EFA6BKO55 cells transfected with the indicated siRNAs and stained for cortactin (green), F-actin (red) and nuclei (blue). The right image is the merge of all three markers. The co-localization of cortactin with F-actin appearing in orange indicates the presence of invadopodia. Scale bar 10 $\mu$ m. **c** Representative images of the corresponding cells shown in b) placed in collagen for 4 days. The cell aggregates were processed for immunofluorescence to label the endogenous F-actin (red) and the nuclei (blue). Scale bars 20 $\mu$ m. Arrowheads point to long membrane protrusions. **d** pMLC is not seen enriched in invadopodia. Representative images of the indicated cells grown 2 days on collagen I-coated coverslips stained for cortactin (red), pMLC (green) and F-actin (blue). The third panel is a merge of all three markers. The purple color shows the co-localization of cortactin (red) and F-actin (blue) in invadopodia, some of which indicated by arrowheads. The large inset is a 2X zoom-in image of the indicated area. Scale bars 10 $\mu$ m. Source data are provided as a Source Data file.

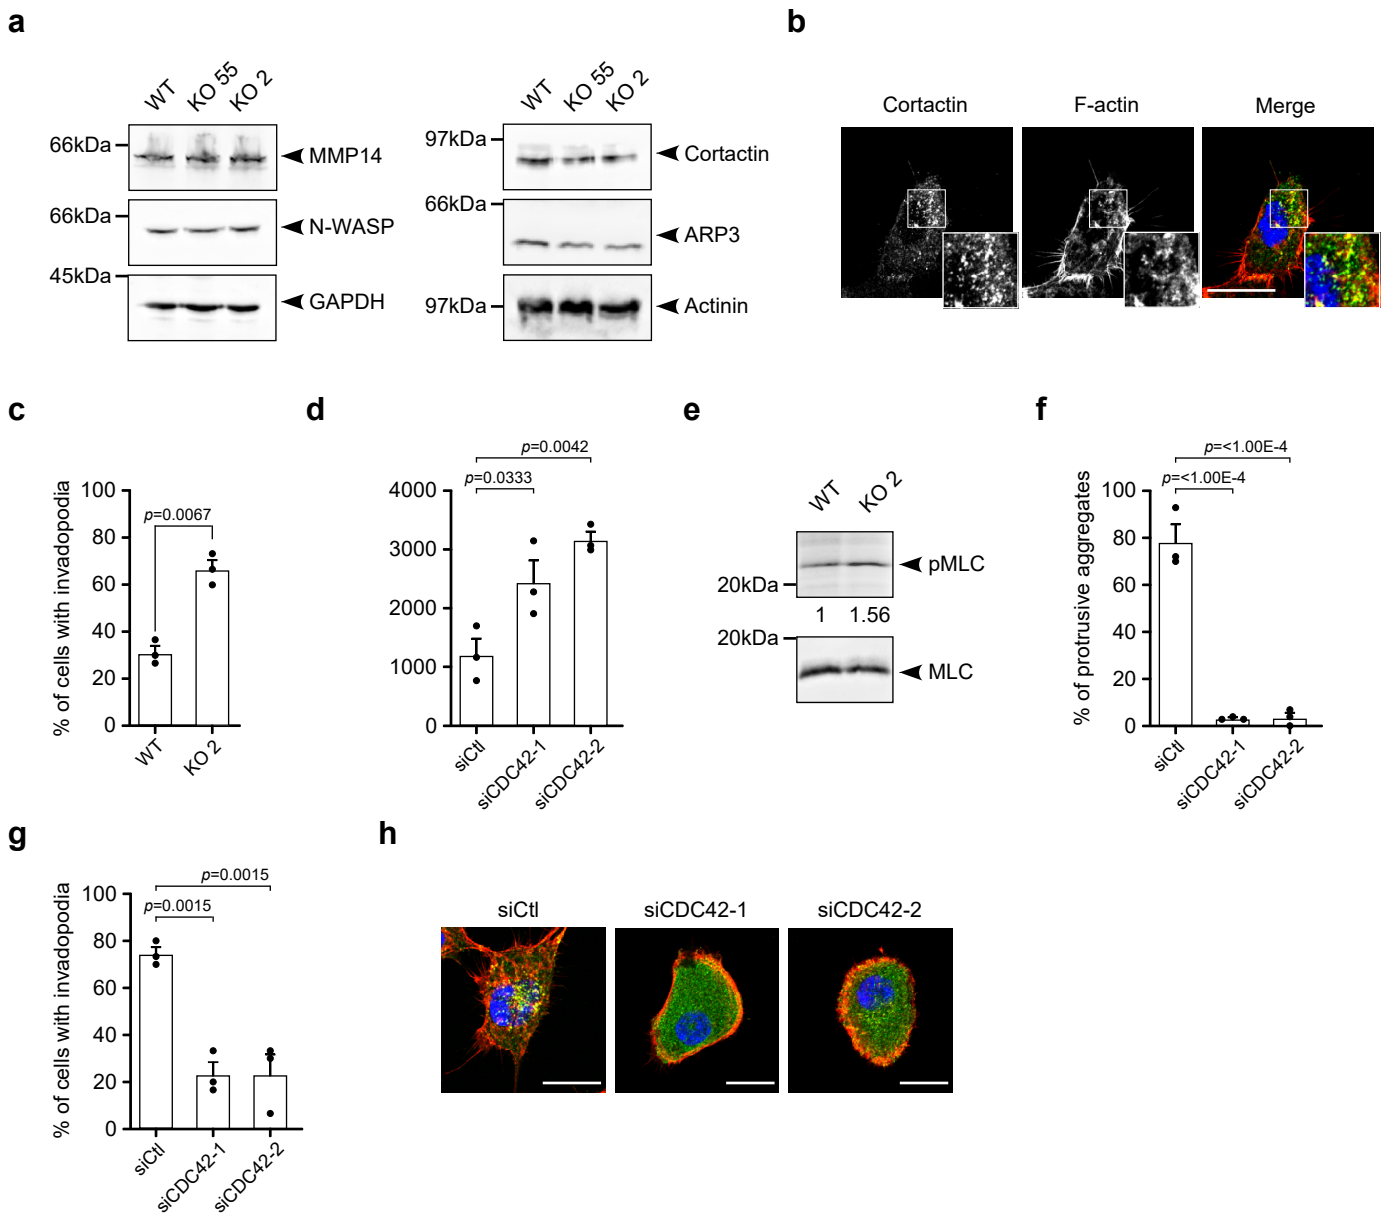

**Supplementary Figure 6:** EFA6B KO2 cells display contractility and invasive properties similar to the KO55 cells. **a** Expression of the indicated proteins analyzed by immunoblot in MCF10A WT, EFA6B KO55 and EFA6B KO2 cells. **b** Representative images of the EFA6B KO2 cells grown 2 days on collagen I-coated coverslips and stained for cortactin (green), F-actin (red) and nuclei (blue). The large inset is a 2X zoom-in image of the indicated area. Scale bar 20 $\mu$ m. **c** Quantification of the percentage of indicated cells (n=30) displaying invadopodia. N=3, average  $\pm$ SEM, two-tailed Student's t-test  $p$  value. **d** Quantification of the contractility of EFA6B KO2 cells transfected with the indicated siRNA evaluated by a collagen gel contraction assay. Values are mean surface area of the collagen gel  $\pm$ SEM. N=3, one-way ANOVA test with Dunnett's multiple comparison  $p$  values. **e** Expression of pMLC and total MLC analyzed by immunoblot in MCF10A WT and EFA6B KO2 cells, N=2. **f** Quantification of the percentage of aggregates with invasive protrusions of EFA6B KO2 cells grown in collagen I for 2 days post-transfection with the indicated siRNAs. N=3, average  $\pm$ SEM, one-way ANOVA test with Dunnett's multiple comparison  $p$  values. **g** Quantification of the percentage of invadopodia in EFA6B KO2 cells grown in collagen I for 2 days post-transfection with CDC42 targeted siRNAs. N=3, average  $\pm$ SEM, one-way ANOVA test with Dunnett's multiple comparison  $p$  values. **h** Representative images of EFA6B KO 2 cells transfected with the indicated siRNAs and stained for cortactin (green), F-actin (red) and nuclei (blue). Scale bars 20 $\mu$ m. Source data are provided as a Source Data file.

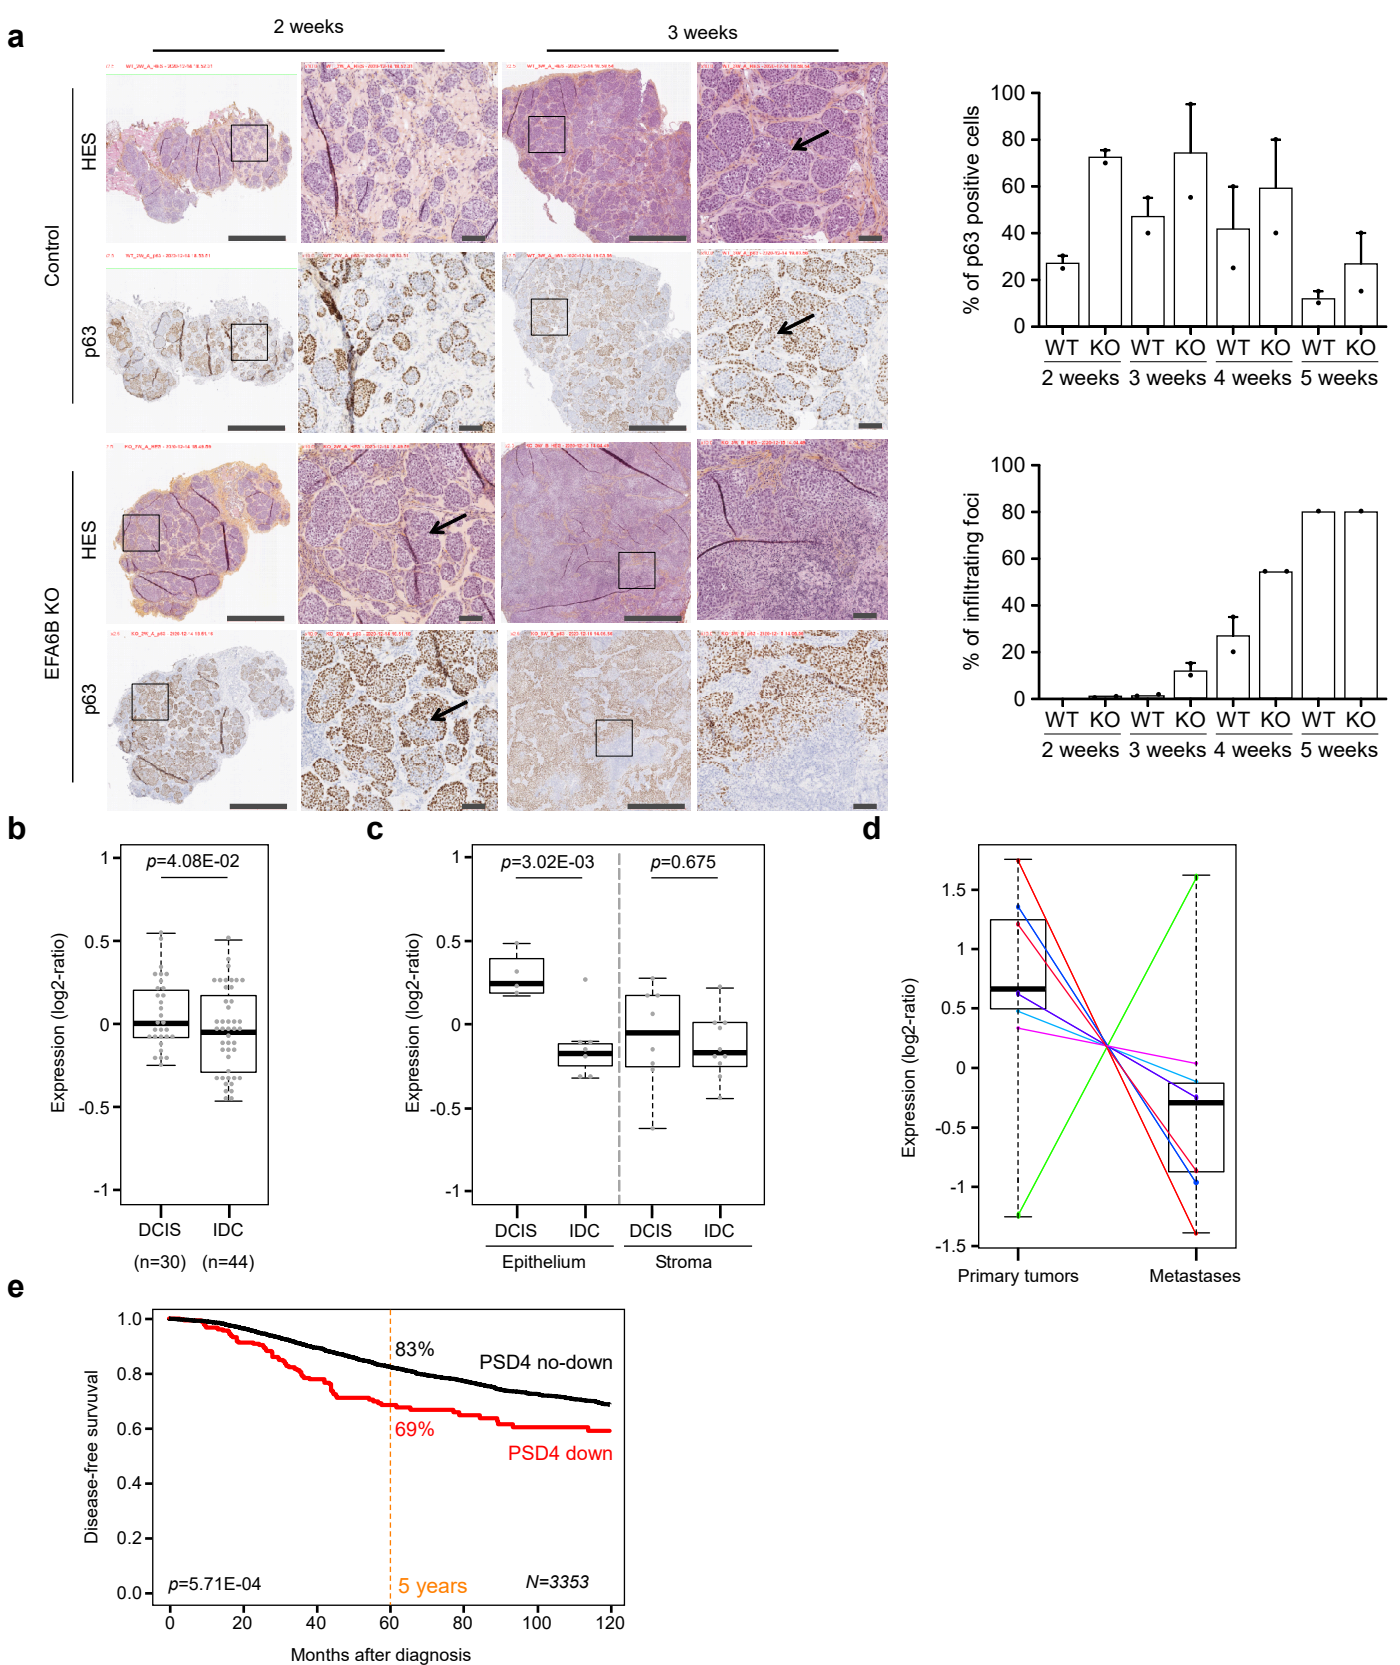

**Supplementary Figure 7:** EFA6B KO in MCF10DCIS.com cells stimulates tumor infiltration, and EFA6B/*PSD4* expression is down-regulated in human clinical TNBC samples endowed with invasive properties. **a** Representative images of control MCF10DCIS.com and EFA6B KO xenografts sequential sections analyzed by hematoxylin-eosin-safran staining and immunohistochemistry for the expression of p63. Arrows point to invasive tumors visible at week 2 or week 3 post-injection of EFA6B KO or control cells, respectively. Scale bars 1mm. The right panels are zoom-in image of the indicated area, scale bars 100µm. Right: Quantification of the percentage of p63<sup>+</sup> cells (top panel) and infiltrating foci (bottom panel) from two sections of two different mice, except at 5 weeks where infiltrating foci were quantified on one section.

**b, c** and **d**: for each box and whisker plot, the median value (50th percentile) and interquartile ranges (25th and 75th percentile) are indicated; points outside the whisker boundaries are defined as outliers. **b** Expression of *PSD4* in DCIS compared to IDC. The *p*-value is for the Two-tailed Student's *t*-test. **c** Expression of *PSD4* is selectively decreased in the epithelial compartment of DCIS (epithelium DCIS *n*=4, IDC=7; stroma DCIS *n*=8, IDC *n*=10). The *p*-values are for the two-tailed Student's *t*-test. **d** Expression of *PSD4* in primary tumors compared to paired metastases (*n*=9 pairs). The *p*-value is for the paired Mann-Whitney test. **e** Kaplan-Meier curves for DFS according to *PSD4* expression. The *p*-value is for the log-rank test. Source data are provided as a Source Data file.



# Supplementary Figure 8: Flow cytometry gating strategy

Figure 2a

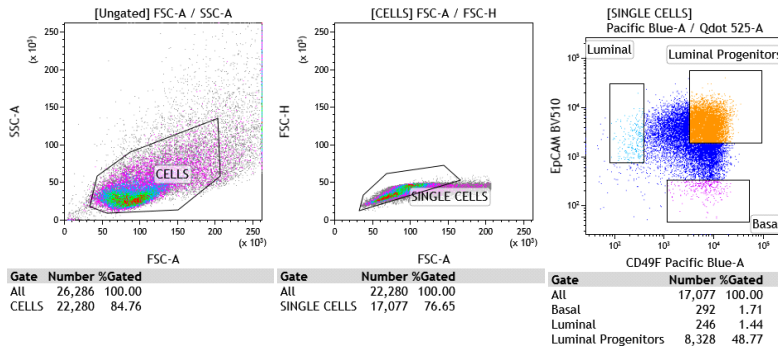

Figure 4a

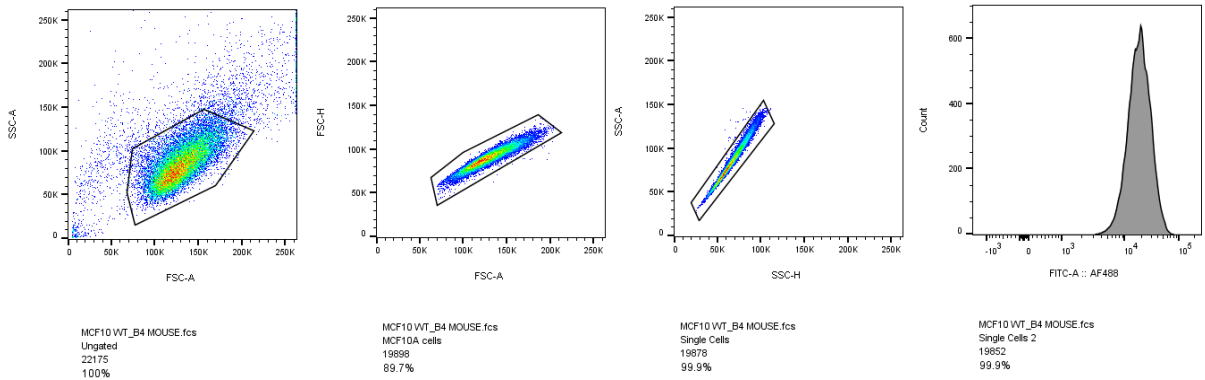

Supp. Fig.3c

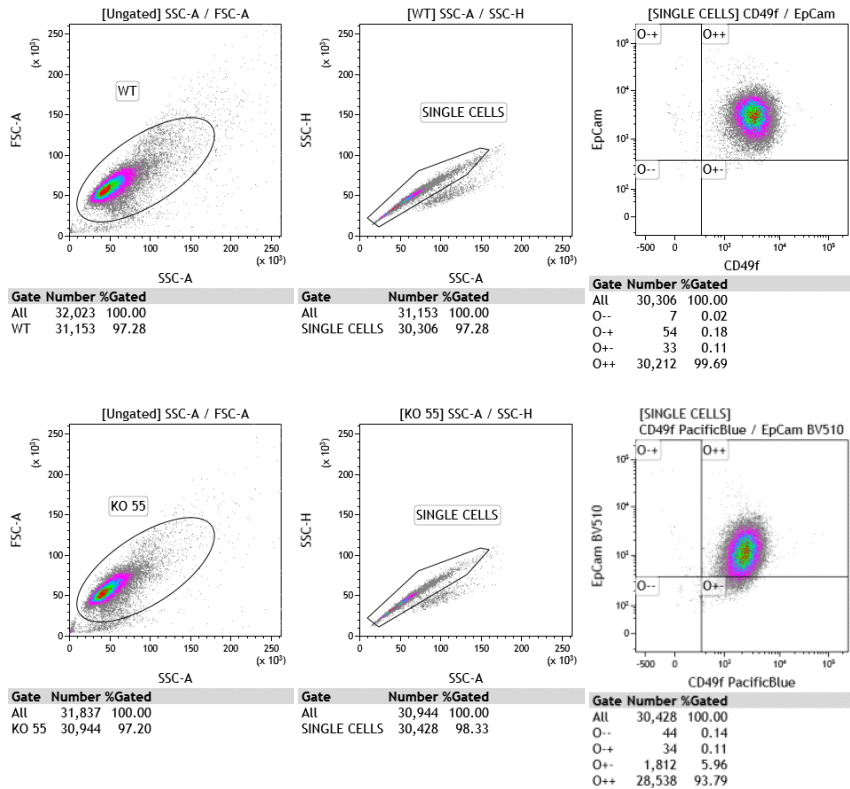



Supplementary Table 1: List of four BC data sets included in the study

| Reference                     | Source of data                 | N° of samples | Technological platform | N° of probe sets | N° of samples used |
|-------------------------------|--------------------------------|---------------|------------------------|------------------|--------------------|
| Jonsson et al.,<br>BCR 2010   | GEO: GSE22133                  | 359           | Swegene H_v2.1.1 55K   | 55K              | 346                |
| TCGA,<br>Nature 2012          | TCGA Data Portal - BRCA -      | 1215          | Illumina, RNAseq V2    | 20K              | 1092               |
| Ellis et al.,<br>Nature 2012  | GEO: GSE29442, GSE35186        | 201           | Agilent-014850 4x44K   | 44K              | 201                |
| Curtis et al.,<br>Nature 2012 | METBARIC: EGA: EGAS00000000083 | 2136          | Illumina HT 12         | 49K              | 1974               |
| TOTAL                         |                                | 3911          |                        |                  | 3613               |

**Supplementary Table 2: Correlations of PSD4 expression with clinico-pathological features of BC**

| Characteristics                     | N    | PSD4 expression |                     | p-value         |
|-------------------------------------|------|-----------------|---------------------|-----------------|
|                                     |      | down<br>(N=306) | no down<br>(N=3307) |                 |
| Age at diagnosis, years             |      |                 |                     | <b>6.68E-05</b> |
| ≤50                                 | 753  | 93 (33%)        | 660 (22%)           |                 |
| >50                                 | 2514 | 191 (67%)       | 2323 (78%)          |                 |
| Pathological grade                  |      |                 |                     | <b>2.86E-11</b> |
| 1                                   | 232  | 7 (4%)          | 225 (10%)           |                 |
| 2                                   | 1007 | 35 (22%)        | 972 (45%)           |                 |
| 3                                   | 1087 | 116 (73%)       | 971 (45%)           |                 |
| Pathological lymph node status (pN) |      |                 |                     | 0.752           |
| negative                            | 1522 | 134 (51%)       | 1388 (50%)          |                 |
| positive                            | 1509 | 127 (49%)       | 1382 (50%)          |                 |
| Pathological tumor size (pT)        |      |                 |                     | <b>3.86E-04</b> |
| pT1                                 | 1189 | 75 (27%)        | 1114 (38%)          |                 |
| pT2                                 | 1699 | 169 (61%)       | 1530 (53%)          |                 |
| pT3                                 | 292  | 35 (13%)        | 257 (9%)            |                 |
| Pathological type                   |      |                 |                     | <b>3.18E-03</b> |
| ductal                              | 2505 | 230 (81%)       | 2275 (76%)          |                 |
| lobular                             | 383  | 16 (6%)         | 367 (12%)           |                 |
| other                               | 377  | 38 (13%)        | 339 (11%)           |                 |
| Molecular subtype, mRNA*            |      |                 |                     | <b>6.36E-50</b> |
| HR+/HER2-                           | 2569 | 112 (37%)       | 2457 (75%)          |                 |
| HER2+                               | 398  | 49 (16%)        | 349 (11%)           |                 |
| TN                                  | 628  | 142 (47%)       | 486 (15%)           |                 |
| 5-year DFS [95% CI]                 | 3353 | 69% [62-76]     | 83% [81-84]         | <b>5.71E-04</b> |
| Follow-up median, months (min-max)  | 3353 | 38 (1-232)      | 73 (1-382)          | <b>2.12E-08</b> |

\*, status defined as previously described (Zangari et al, Cancer Res 2014)

p-value were based on Student t-test for continuous variables, Fisher's exact test for categorical variables and Log-rank test for the DFS. All statistical tests were two-sided at the 5% level of significance.

Supplementary Table 3: List of primary antibodies used in this study

| Antigen     | Antibody source and reference  | Application (dilution from stock or concentration)                            |
|-------------|--------------------------------|-------------------------------------------------------------------------------|
| Integrin-β1 | Santa Cruz, sc-53711           | Immunoblot 1/200                                                              |
| Integrin-β1 | Santa Cruz, sc-13590           | Flow cytometry 1/200<br>Immunofluorescence 1/100<br>Blocking antibody 7μg/ml  |
| Integrin-β4 | BD Biosciences, 611232         | Immunoblot 1/200<br>Immunofluorescence 1/100                                  |
| Integrin-β4 | BD Biosciences, 555719         | Flow cytometry 1/200                                                          |
| Integrin-β4 | Millipore, MAB2059             | Blocking antibody 30μg/ml                                                     |
| Integrin-α2 | Santa Cruz, sc-53502           | Flow cytometry 1/200<br>Immunofluorescence 1/100                              |
| Integrin-α2 | Millipore, MAB1950             | Blocking antibody 14μg/ml                                                     |
| Integrin-α3 | Millipore, MAB2057             | Flow cytometry 1/200<br>Immunofluorescence 1/100<br>Blocking antibody 30μg/ml |
| Integrin-α6 | BD Biosciences, 555734         | Flow cytometry 1/200<br>Immunofluorescence 1/100<br>Blocking antibody 30μg/ml |
| EpCAM       | BD Biosciences, 563181         | Flow cytometry 1/250                                                          |
| CD49f       | BD Biosciences, 562582         | Flow cytometry 1/1000                                                         |
| CD24        | BD Biosciences, 561644         | Flow cytometry 1/250                                                          |
| CD44        | BD Biosciences, 560568         | Flow cytometry 1/125                                                          |
| N-cadherin  | BD Biosciences, 610921         | Immunofluorescence 1/50<br>Immunoblot 1/500                                   |
| E-cadherin  | Thermo Scientific, 33-4000     | Immunofluorescence 1/50                                                       |
| E-cadherin  | BD Biosciences, 610182         | Immunoblot 1/200                                                              |
| Vimentin    | Sigma, V6389                   | Immunoblot 1/100                                                              |
| Claudin 1   | ZYMED Laboratories, 51-9000    | Immunoblot 1/100                                                              |
| Claudin 3   | Millipore, 2819163             | Immunoblot 1/200                                                              |
| Occludin    | Thermo Scientific, 40-4700     | Immunoblot 1/100                                                              |
| ARF1        | Novus Biologicals, NB100-55421 | Immunoblot 1/200                                                              |
| ARF5        | Abnova, H00000381-M01          | Immunoblot 1/200                                                              |
| ARF6        | Gift from Dr. Bourgoin         | Immunoblot 1μg/ml                                                             |
| EFA6A       | Gift from Dr. Sakagami         | Immunoblot 1μg/ml                                                             |
| EFA6B       | Sigma, HPA034722               | Immunoblot 1/200                                                              |
| EFA6D       | Gift from Dr. Sakagami         | Immunoblot 1μg/ml                                                             |
| MMP-14      | Millipore, MAB3328             | Immunoblot 1/100                                                              |
| Cortactin   | Millipore, 05-180              | Immunofluorescence 1/100<br>Immunoblot 1/200                                  |
| N-WASP      | Cell Signaling, 4848           | Immunoblot 1/200                                                              |
| ARP3        | BD Biosciences, 612234         | Immunoblot 1/200                                                              |
| pMLC        | Cell Signaling, 3671 & 3675    | Immunoblot 1/50<br>Immunofluorescence 1/25                                    |
| MLC         | Sigma, M4401                   | Immunoblot 1/100                                                              |
| CDC42       | BD Biosciences, 610928         | Immunoblot 1/200                                                              |
| RAC1        | BD Biosciences, 610650         | Immunoblot 1/200                                                              |
| RHOA        | Santa Cruz, sc-418             | Immunoblot 1/200                                                              |
| RHOC        | Cell Signaling, 3430           | Immunoblot 1/200                                                              |
| ROCK 1      | Santa Cruz, sc-17794           | Immunoblot 1/50                                                               |
| ROCK 2      | Santa Cruz, sc-398519          | Immunoblot 1/200                                                              |
| P63         | Diagomics, BSB3606             | Immunohistochemistry 1/50                                                     |
| Actin       | Sigma, A4700                   | Immunoblot 1/500                                                              |
| Actinin     | Sigma, A5044                   | Immunoblot 1/500                                                              |
| GST         | GE Healthcare, 27-4577-01      | Immunoblot 1/1000                                                             |
| Hsp60       | Sigma, SAB4501464              | Immunoblot 1/200                                                              |
| p85         | Millipore, ABS1856             | Immunoblot 1/200                                                              |
| GAPDH       | Sigma, G9545                   | Immunoblot 1/500                                                              |

Supplementary Table 4: List of RT-qPCR oligonucleotides used in this study

| <b><i>Oligo name</i></b>       | <b><i>Sequence forward (5'-3')</i></b> | <b><i>Sequence reverse (5'-3')</i></b> |
|--------------------------------|----------------------------------------|----------------------------------------|
| <b>E-Cadherin</b>              | TGCCCAGAAAATGAAAAAGG                   | GTGTATGTGGCAATGCGTTC                   |
| <b>N-Cadherin</b>              | ACAGTGGCCACCTACAAAGG                   | CCGAGATGGGGTTGATAATG                   |
| <b>Vimentin</b>                | GAGAACTTTGCCGTTGAAGC                   | GCTTCTGTAGGTGGCAATC                    |
| <b>CK14</b>                    | GGAAGCCGACATCAATGG                     | GCCTCTCAGGGCATTTCATC                   |
| <b>ITGA6</b>                   | GATGCCACATATCACAAGGC                   | TGCATCAGAAGTAAGCCTCTCT                 |
| <b>Occludin</b>                | TCAGGGAATATCCACCTATCACTTCAG            | CATCAGCAGCAGCCATGTACTCTTCAC            |
| <b>Claudin 7</b>               | AGAGCACGGGGATGATGAG                    | CACCCATGGCTATACGGGC                    |
| <b>Snail 1</b>                 | GCTGCAGGACTCTAATCCAGA                  | ATCTCCGGAGGTGGGATG                     |
| <b>Snail 2</b>                 | GGGGAGAAGCCTTTTTCTTG                   | TCCTCATGTTTGTGCAGGAG                   |
| <b>Twist 1</b>                 | GGCTCAGCTACGCCTTCTC                    | CCTTCTCTGGAAACAATGACATCT               |
| <b>Twist 2</b>                 | CCTCTGACAAGCTGAGCAAG                   | GCAGGACCTGGTAGAGGAAG                   |
| <b>Zeb 1</b>                   | AACTGCTGGGAGGATGACA                    | TCCTGCTTCATCTGCCTGA                    |
| <b>Zeb 2</b>                   | CGATCCAGACCGCAATTAAC                   | TGCTGACTGCATGACCATC                    |
| <b>MRCK<math>\alpha</math></b> | TGAATACGCCTACCGATGCT                   | GTGAGTCTTGCGCTTAGGTG                   |
| <b>MRCK<math>\beta</math></b>  | CCGGAAGATATGGCGAGGTTCC                 | CCATTCACGTCCAAAAGGACAT                 |
| <b>GAPDH</b>                   | TGCCTCCTGCACCACCAACT                   | CCCGTTCAGCTCAGGGATGA                   |
| <b>HPRT1</b>                   | TGACCTTGATTTATTTTGCATACC               | CGAGCAAGACGTTTCAGTCCT                  |
| <b>U1snRNA</b>                 | GGGAGATACCATGATCACGAAGGT               | ATGCAGTCGAGTTTCCACA                    |



Supplementary Table 5: List of siRNA oligonucleotides used in this study

| <b><i>Oligo name</i></b>       | <b><i>Sequence forward (5'-3')</i></b> | <b><i>Sequence reverse (5'-3')</i></b> |
|--------------------------------|----------------------------------------|----------------------------------------|
| <b>MMP14-1</b>                 | CACAAGGACUUUGCCUCUGAA                  | UUCAGAGGCAAAGUCCUUGUG                  |
| <b>MM14-2</b>                  | AACAGGCAAAGCUGAUGCAGA                  | UCUGCAUCAGCUUUGCCUGUU                  |
| <b>Snail1-1</b>                | GGACUUUGAUGAAGACCAU                    | AUGGUCUUCAUCAAGUCC                     |
| <b>Snail1-2</b>                | AAUCGGAAGCCUAACUACA                    | UGUAGUUAGGCUUCCGAUU                    |
| <b>Zeb1-1</b>                  | CAGUGAAAGAGAAGGGAAU                    | AUUCUUUCUCUUCACUG                      |
| <b>Zeb1-2</b>                  | AACUGAACCUUGGUAUUU                     | AUAAUCCACAGGUUCAGUU                    |
| <b>Twist1-1</b>                | GGACAAGCUGAGCAAGAUU                    | AAUCUUGCUCAGCUUGUCC                    |
| <b>Twist1-2</b>                | GGUACAUCGACUCCUCUA                     | UAGAGGAAGUCGAUGUACC                    |
| <b>Cdc42-1</b>                 | CCGGUGGAGAAGCUGAGGUCAUCAU              | AUGAUGACCUCAGCUUCUCCACCGG              |
| <b>Cdc42-2</b>                 | AAAGACUCCUUUCUUGCUUGU                  | ACAAGCAAGAAAGGAGUCUUU                  |
| <b>RhoA-1</b>                  | CGACAGCCCUGAUAGUUUA                    | UAAACUAUCAGGGCUGUCG                    |
| <b>RhoA-2</b>                  | GACCAAGAUGGAGUGAGA                     | UCUCACUCCAUCUUUGGUC                    |
| <b>RhoC-1</b>                  | AUAAGAAGACCUGAGGCA                     | UGCCUCAGGUCCUUCUUAU                    |
| <b>RhoC-2</b>                  | GGAUCAGUGCCUUUGGCUA                    | UAGCCAAAGGCACUGAUCC                    |
| <b>Rac1-1</b>                  | UAAGGAGAUUGGUGCUGUA                    | UACAGCACCAAUUCUCCUUA                   |
| <b>Rac1-2</b>                  | UAAAGACACGAUCGAGAAA                    | UUUCUCGAUCGUGUCUUUA                    |
| <b>MRCK<math>\alpha</math></b> | CUUAUACCUGGUUAUGGAUUUUUAU              | AUAAUAAUCCAUAACCAGGUUAAG               |
| <b>MRCK<math>\beta</math></b>  | UAAAUCACCACCCACAUAGUAAUCC              | GGAUUACUAUGUGGGUGGUAUUUA               |
| <b>ROCK1-2</b>                 | GCCAAUGACUUAUUAGGA                     | UCCUAAGUAAGUCAUUGGC                    |
| <b>ROCK1-1</b>                 | CCAGGAAGGUUAUUGCUAU                    | AUAGCAUAUACCUUCCUGG                    |
| <b>ROCK2-1</b>                 | UAGAAUAUGUGGCCUAGAA                    | UUCUAGGCCACAUAUUCUA                    |
| <b>ROCK2-2</b>                 | CAAACUUGGUAAAAGAAUUG                   | CAAUUCUUUACCAAGUUUG                    |
| <b>NWASP-1</b>                 | CAGCAGAUCCGAACUGUAU                    | UACCAAGAAACUCCCGUAC                    |
| <b>NWASP-2</b>                 | UAGAGAGGGUGCUCAGCUA                    | UAGCUGAGCACCCUCUCUA                    |
| <b>Arp3-1</b>                  | GGACAGAGUCACAGUAGUC                    | GACUACUGUGACUCUGUCC                    |
| <b>Arp3-2</b>                  | GUACGGGAGUUUCUUGGUA                    | UACCAAGAAACUCCCGUAC                    |
